# Supplementary material
Source: PubMed Central journal article supplement (PMC4275776)
Supplement: Supp_Figure1.pdf [file Supp_Figure1.pdf]

## Supplementary Data

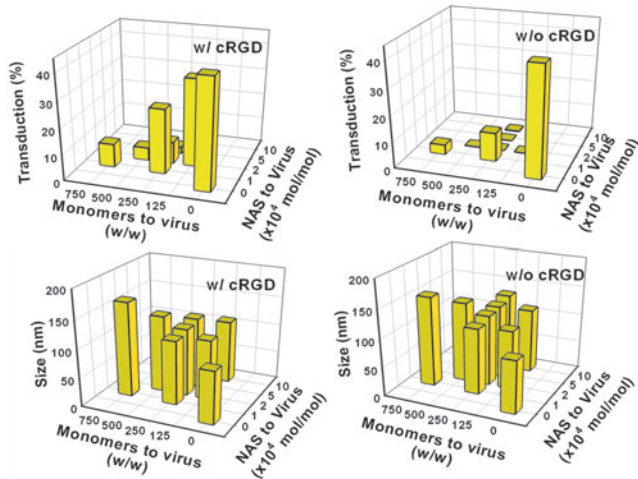

**SUPPLEMENTARY FIG. S1.** Optimization of transduction efficiency of the targeting nanovirus. VSV-G pseudotyped lentivirus (p24=60 ng) were reacted with different amounts of NAS and monomers with or without cRGD. P24=10 ng virus were then used to infect  $1 \times 10^5$  Hela cells for 4 hr. Virus transduction was monitored by EGFP expression 3 days post transduction (top panel). Sizes of the virus nanocapsules were measured by DLS (bottom panel). Left panel is the virus with cRGD and right panel is the virus without cRGD. At a combination ratio of NAS:virus (m/m= $2 \times 10^4$ ) and monomer:virus (w/w=125), we obtained the best transduction efficiency by cRGD-nVSVG (35%) while transduction efficiency by nVSV-G is 0%. Transduction efficiency of VSV-G pseudotypes is 42%.
