# Supplementary material
Source: PubMed Central journal article supplement (PMC4275776)
Supplement: Supp_Figure2.pdf [file Supp_Figure2.pdf]

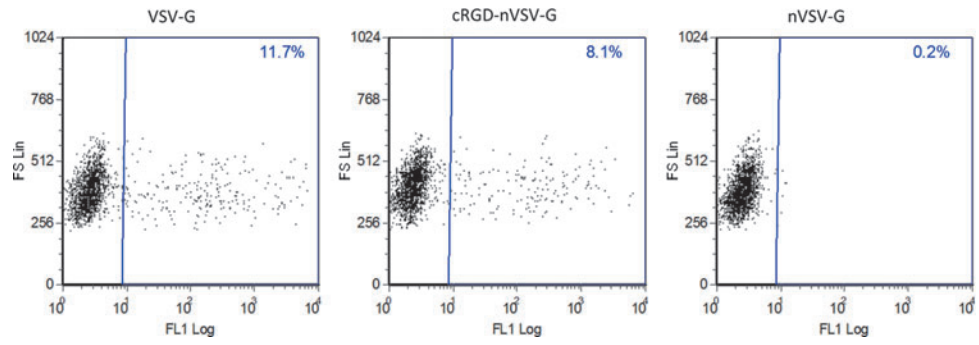

**SUPPLEMENTARY FIG. S2.** Transduction of human umbilical vein endothelial cells (HUVEC) by targeting nanovirus.  $1 \times 10^5$  HUVEC cells were transduced with equal amounts of VSV-G, cRGD-nVSV-G, and nVSV-G (p24=10 ng). EGFP expression was monitored by flow cytometry 3 days post transduction.
