# Supplementary material
Source: PubMed Central journal article supplement (PMC4275776)
Supplement: Supp_Figure3.pdf [file Supp_Figure3.pdf]

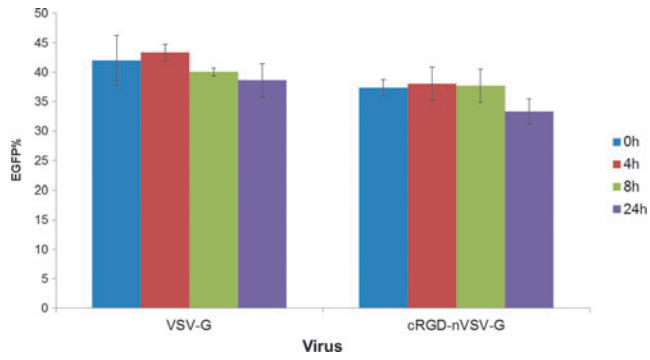

**SUPPLEMENTARY FIG. S3.** Stability of the targeting nanovirus at 4°C at different timepoints. VSV-G pseudotypes and the targeting nanovirus were incubated on ice for 0 hr, 4 hr, 8 hr, and 24 hr, then the viruses were used to infect  $1 \times 10^5$  HeLa cells for 4 hr. EGFP expression was monitored by flow cytometry 3 days post transduction.
