# Supplementary material
Source: PubMed Central journal article supplement (PMC4275776)
Supplement: Supp_Figure4.pdf [file Supp_Figure4.pdf]

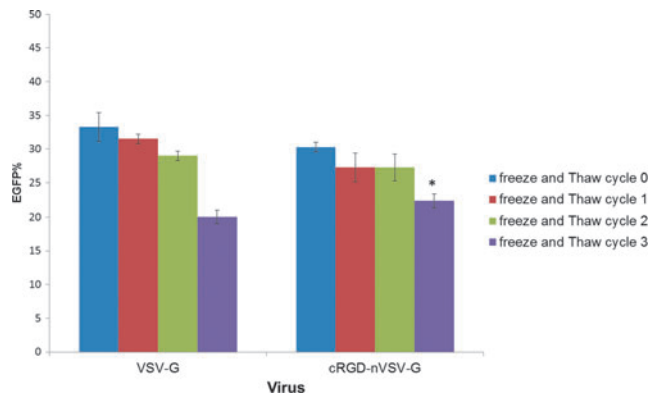

**SUPPLEMENTARY FIG. S4.** Stability of the targeting nanovirus after freeze–thaw cycles. VSV-G pseudotypes and the targeting nanovirus were subjected to freeze–thaw cycles (1, 2, 3), then the viruses were used to infect  $1 \times 10^5$  HeLa cells for 4 hr. EGFP expression was monitored by flow cytometry 3 days post transduction (\* $p < 0.05$ ).
